# Supplementary material
Source: PubMed Central journal article supplement (PMC4199935)

## SUPPLEMENTARY MATERIAL

The figure legend below refers to the files attached individually (Supplementary Figure S1a-c). All files are QuickTime movies and are labeled with their corresponding figure number.

**Supplementary Figure S1. MRSA induces calcium fluxes in THP-1s.** Calcium fluxes were measured by fluorescence activation. THP-1s loaded with AM/Flo-4 1mM and PowerLoad concentrate 1mM 2 hours prior to stimulation with (a) MRSA (MOI 100) alone, (b) pretreated with BAPTA (6 $\mu$ M) then MRSA (MOI 100), or (c) media alone followed by thapsigargin (1 $\mu$ M) (T) as a positive control. All videos were made from images taken every 15 seconds over 20 minutes on an inverted microscope with a GFP mercury laser.

**Supplementary Figure S2. Neutralization of IL-16 does not change recruited cellular populations.** Anti-IL-16 antibody or IgG isotype control was injected i.p. (100  $\mu$ g) 2 hours prior to infection with  $10^7$  cfu MRSA. (a,f) Neutrophils (PMNs) (Ly6G<sup>+</sup>/MHCII<sup>-</sup>), (b,g) Macrophages (CD11c<sup>+</sup>/MHCII<sup>low-mid</sup>), (c,h) Dendritic cells (DCs) (CD11c<sup>+</sup>/MHCII<sup>high</sup>), (d,i) Natural killer cells (NK 1.1<sup>+</sup>) and (e,j) CD4<sup>+</sup> cells in the BALF and lung homogenate respectively were enumerated by FACS. Each dot represents an individual mouse and is compiled from 2 independent experiments. Lines represent median values.

Supplemental Figure S2

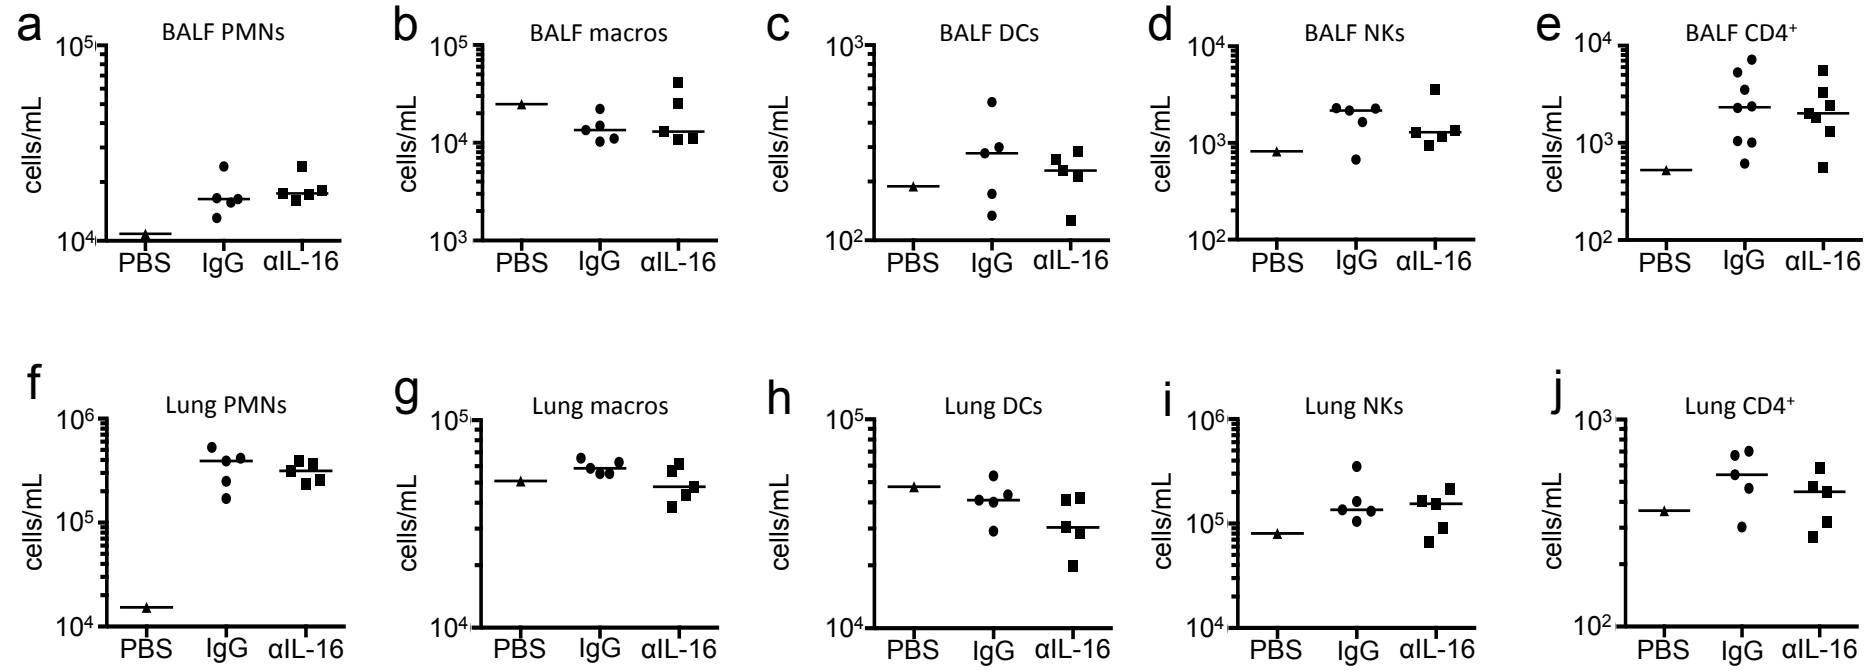

Supplement: NIHMS575167-supplement-01.pdf [file NIHMS575167-supplement-01.pdf]
